# Supplementary material for: First Evidence of the Double-Bond Formation by Deoxydehydration of Glycerol and 1,2-Propanediol in Ionic Liquids
Source: PubMed Central journal article supplement — ACS Omega. 2022 Aug 1;7(32):27980–90. doi: 10.1021/acsomega.2c01803 (PMC9386840; doi:10.1021/acsomega.2c01803), 2022-08-01
Supplement: ao2c01803_si_001.pdf [file ao2c01803_si_001.pdf]

Supplementary material for manuscript:

**First evidence of the double bond formation by deoxydehydration of glycerol  
and 1,2-propanediol in ionic liquids**

by

*Andrea Mascitti,<sup>†</sup> Giuseppe Scioli,<sup>†</sup> Lucia Tonucci,<sup>‡</sup> Valentino Canale,<sup>§</sup> Raimondo Germani,<sup>//</sup>  
Pietro Di Profio<sup>§</sup> and Nicola d'Alessandro<sup>\* †</sup>*

<sup>†</sup> Department of Engineering and Geology, "G. d'Annunzio" University of Chieti-Pescara, Via dei Vestini, 31, 66100 Chieti, Italy

<sup>‡</sup> Department of Philosophical, Educational and Economic Sciences, "G. d'Annunzio" University of Chieti-Pescara, Via dei Vestini, 66100 Chieti, Italy.

<sup>§</sup> Department of Pharmacy, "G. d'Annunzio" University of Chieti-Pescara, Via dei Vestini, 66100 Chieti, Italy.

<sup>//</sup> Department of Chemistry, Biology and Biotechnology, University of Perugia, Via Elce di sotto, 06123 Perugia, Italy

| Index      |                                                                                                         | page |
|------------|---------------------------------------------------------------------------------------------------------|------|
| Figure S1  | GC-MS chromatogram and mass spectrum of allyl alcohol                                                   | 3    |
| Figure S2  | <sup>1</sup> H NMR spectrum of allyl alcohol                                                            | 4    |
| Figure S3  | Calibration straight of allyl alcohol                                                                   | 5    |
| Figure S4  | GC-MS chromatogram of dibromopropane                                                                    | 6    |
| Figure S5  | Mass spectrum of dibromopropane                                                                         | 7    |
| Figure S6  | <sup>1</sup> H NMR spectrum of dibromopropane                                                           | 8    |
| Figure S7  | Calibration straight of dibromopropane                                                                  | 9    |
| Figure S8  | Time course of DODH reaction involving GL and MTO in presence of MOIm-TFSI                              | 10   |
| Figure S9  | Time course of DODH reaction involving GL and Re <sub>2</sub> O <sub>7</sub> in presence of MOIm-TFSI   | 11   |
| Figure S10 | Time course of DODH reaction involving Gly and MTO in presence of MMOBAm-TFSI                           | 12   |
| Figure S11 | Time course of DODH reaction involving GL and Re <sub>2</sub> O <sub>7</sub> in presence of MMOBAm-TFSI | 13   |
| Figure S12 | Time course of DODH reaction involving GL and MTO in presence of MBIm-TFSI                              | 14   |
| Figure S13 | Time course of DODH reaction involving GL and MTO in presence of MBIm-TFSI                              | 15   |
| Figure S14 | Raman spectra of NH <sub>4</sub> ReO <sub>4</sub> , ReO <sub>2</sub> and ReO <sub>3</sub>               | 16   |
| Figure S15 | Raman spectra MTO recorded with 532 and 638 nm laser wavelength                                         | 17   |

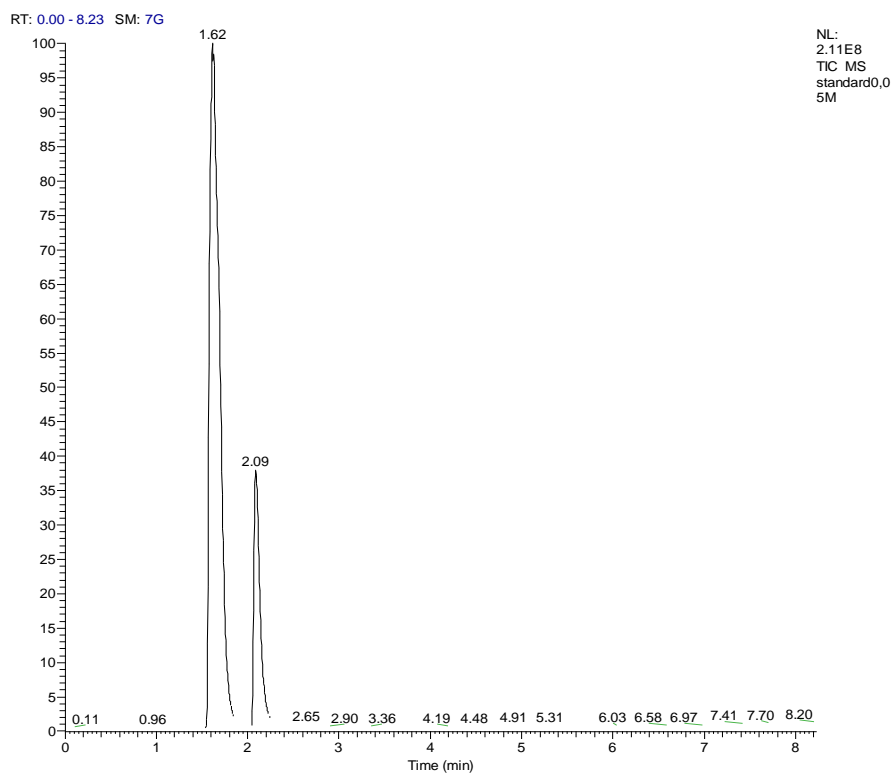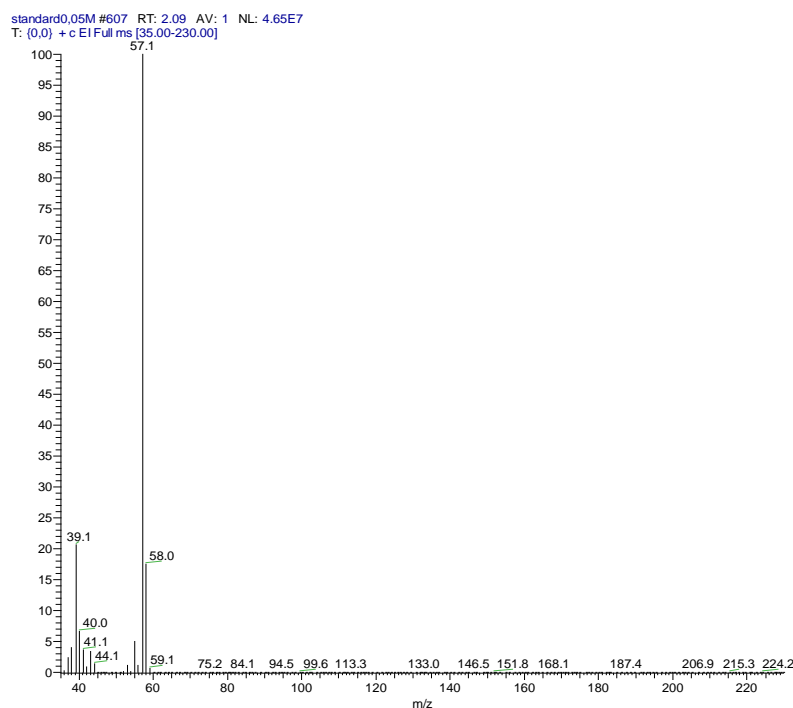

Figure S1

GG-MS chromatogram (top) and mass spectrum (bottom) of allyl alcohol; the chromatogram was recorded with the headspace technique in split mode (1:20) with the GC-MS apparatus set without any acquisition delay time. The sampling was made by a gas tight syringe (50  $\mu$ L) from a 10 mL rubber cap sealed vial containing 5 mL of the water trap, thermostated at 60  $^{\circ}$ C for 15 min. Allyl alcohol is the peak at RT 2.09 while the peak appearing at RT 1.62 is attributable to the other gas present inside the syringe (mainly CO<sub>2</sub>, since the acquisition starts from 33 uma)

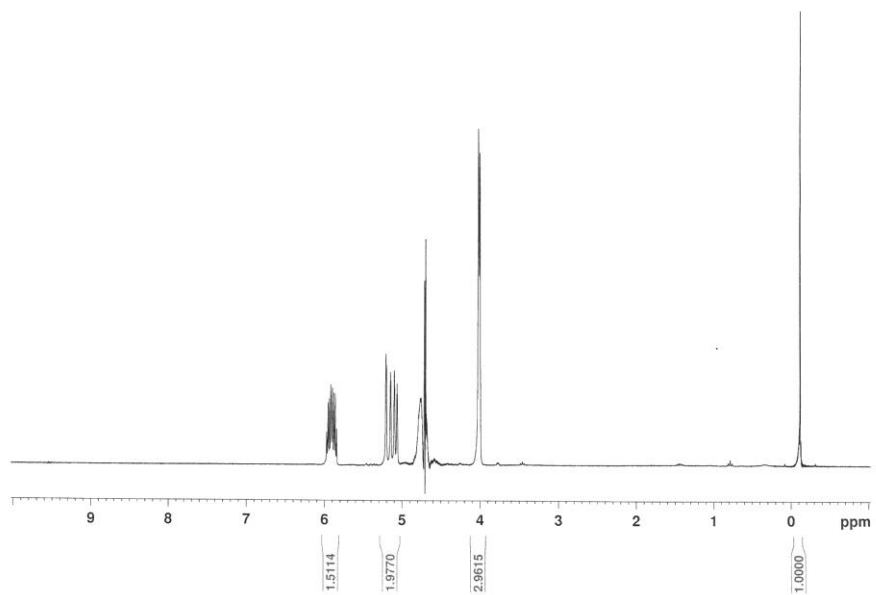

Figure S2

NMR spectrum of allyl alcohol in H<sub>2</sub>O which was recorded placing, inside the NMR tube, a sealed capillary containing a 30 mM D<sub>2</sub>O solution of TSP (signal at around 0 ppm). Areas are normalised giving the unit value to the TSP signal

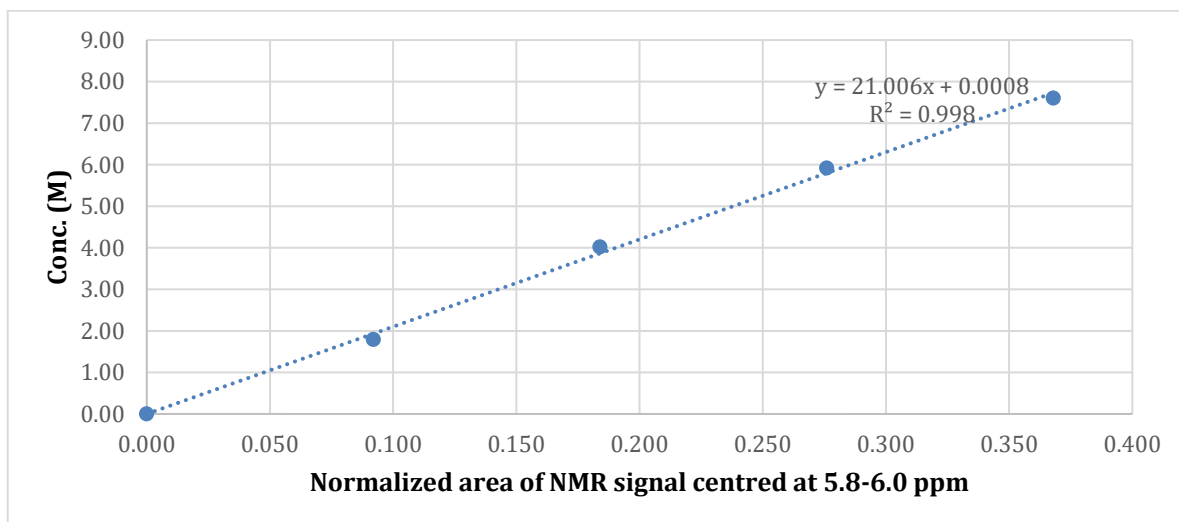

Figure S3

Example of calibration straight, built daily, for quantitative evaluation of allyl alcohol relative to the DODH reaction conducted on Gly.

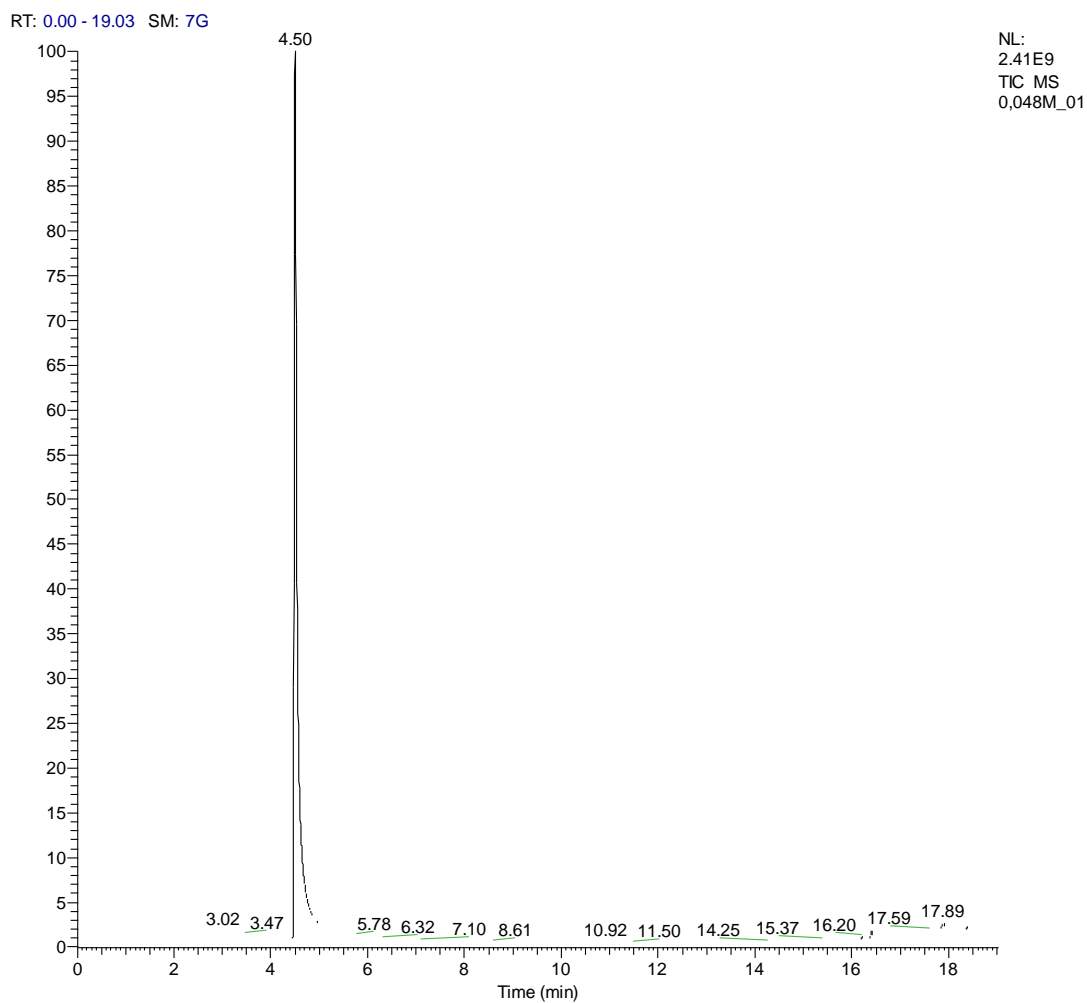

Figure S4  
GC MS chromatogram of 1,2-dibromopropane coming from the DODH reaction on 1,2-propanediol

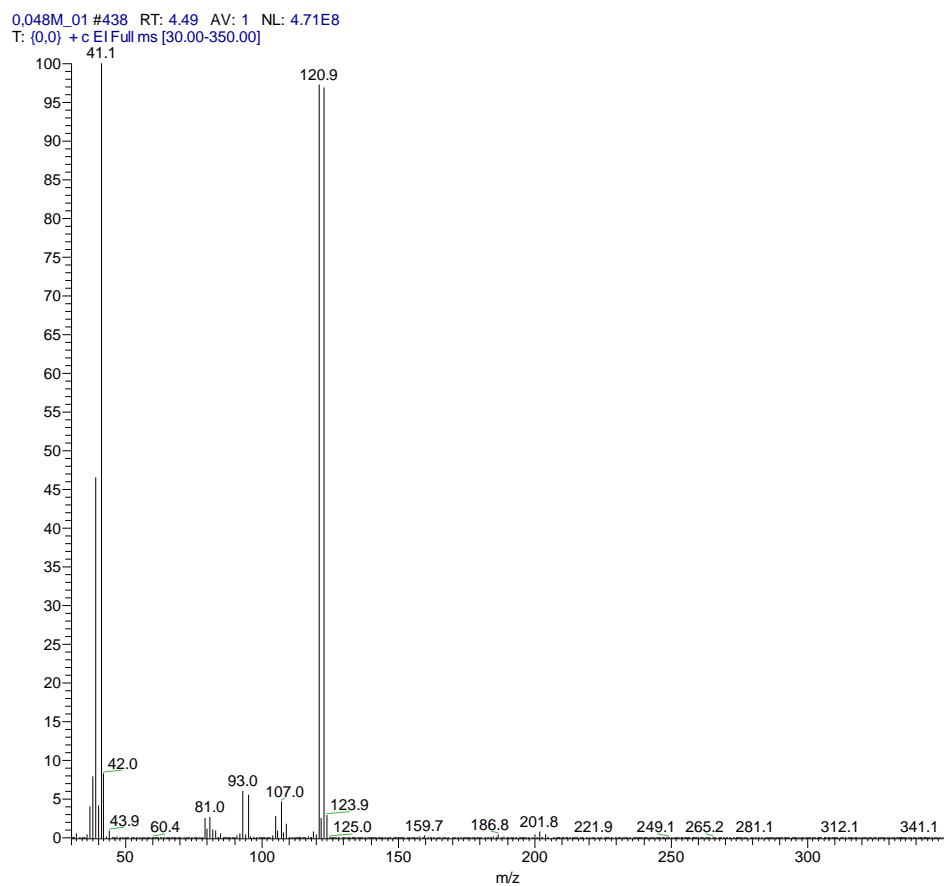

Figure S5  
Mass spectrum of dibromopropane

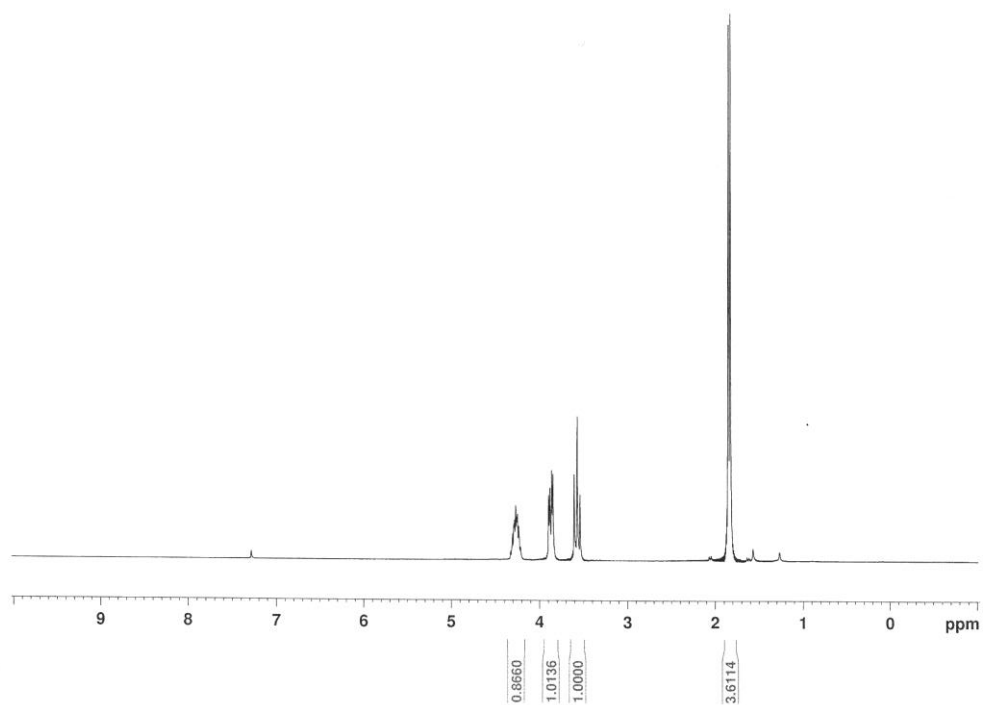

Figure S6  
 $^1\text{H}$  NMR spectrum of 1,2-dibromopropane (in  $\text{CDCl}_3$ )



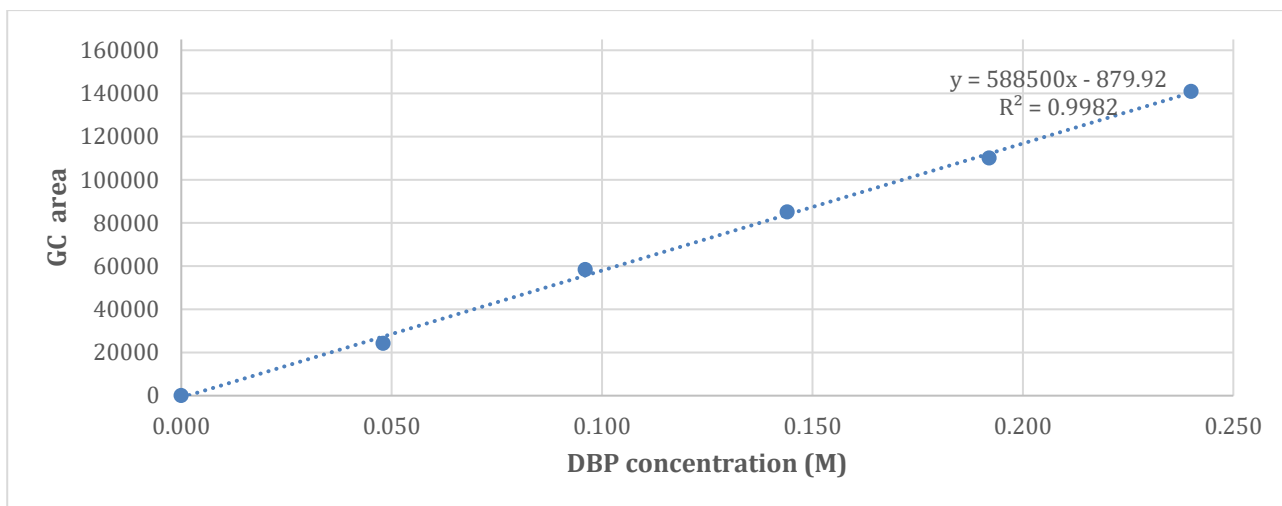

Figure S7  
GC calibration straight of dibromopropane in  $\text{CHCl}_3$

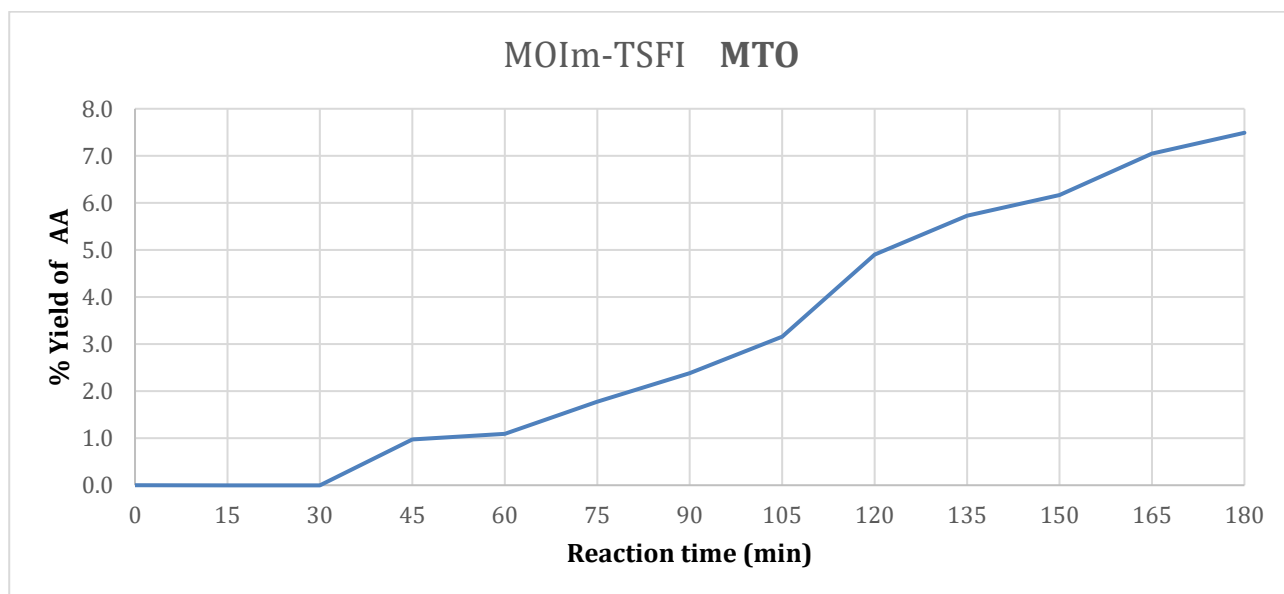

Figure S8  
Time course of DODH reaction of Gly in MOIm-TFSI, catalysed by MTO at very early time (180 min).

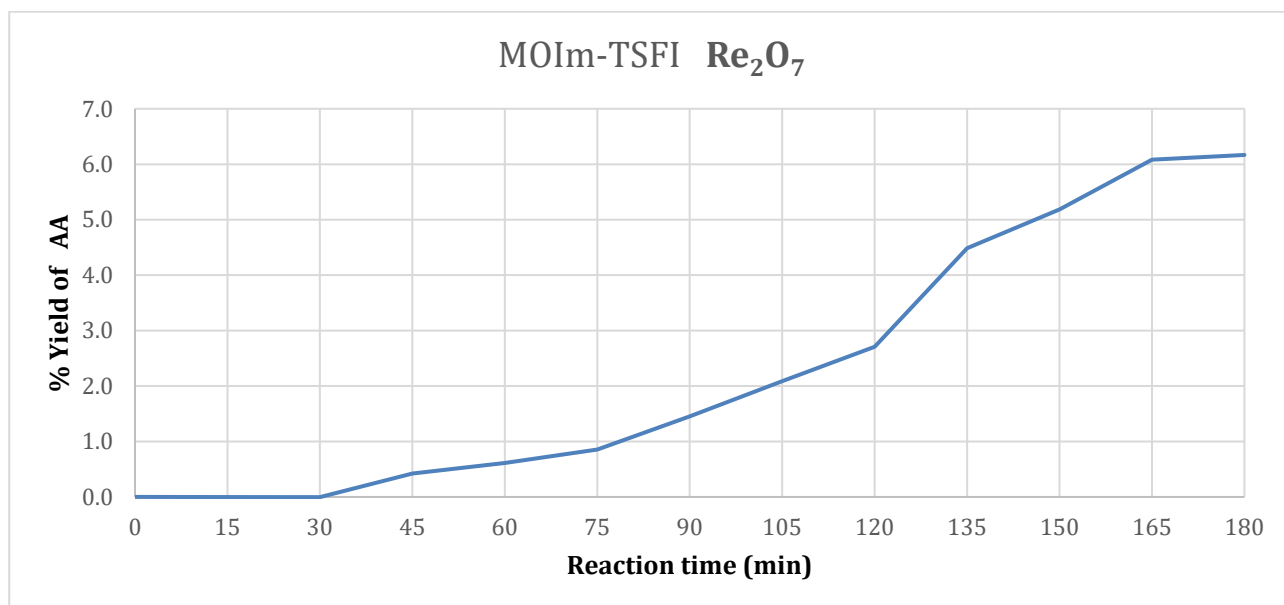

Figure S9  
Time course of DODH reaction of Gly in MOIm-TFSI, catalysed by  $\text{Re}_2\text{O}_7$  at very early time (180 min).

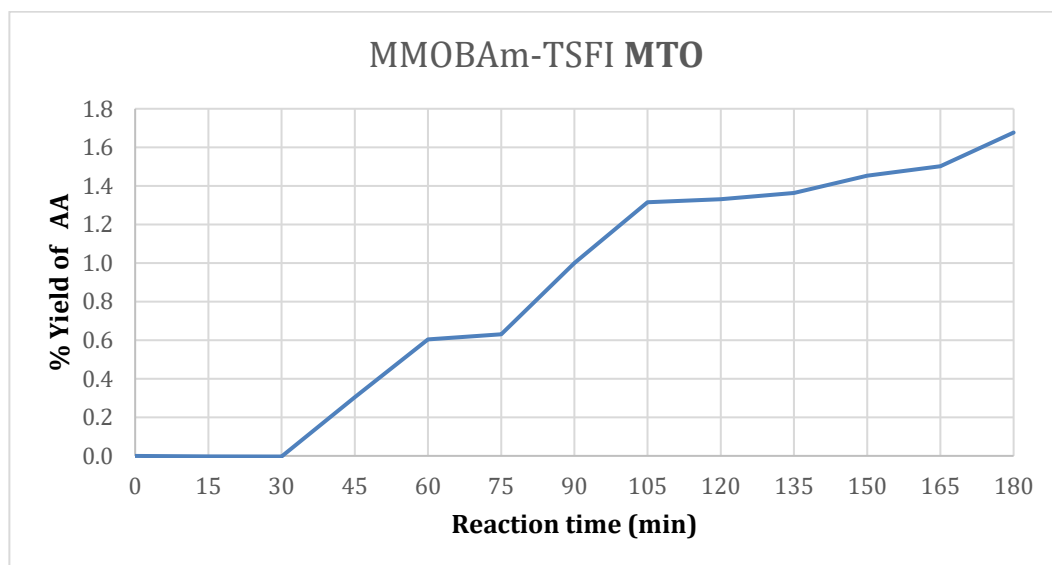

Figure S10  
Time course of DODH reaction of Gly in MMOBAm-TFSI, catalysed by MTO at very early time (180 min).

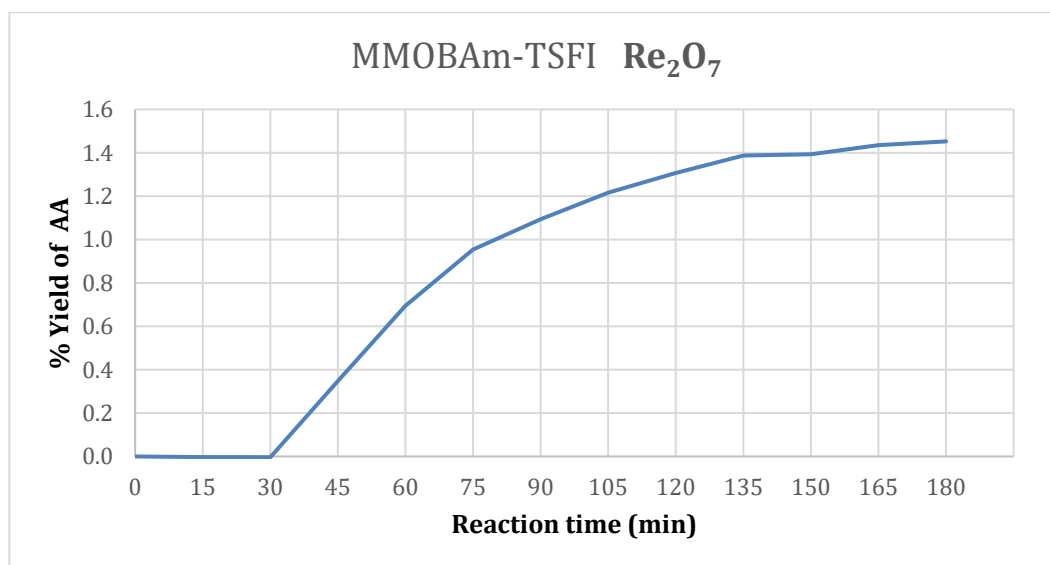

Figure S11  
Time course of DODH reaction of Gly in MMOBAm-TFSI, catalysed by  $\text{Re}_2\text{O}_7$  at very early time (180 min).

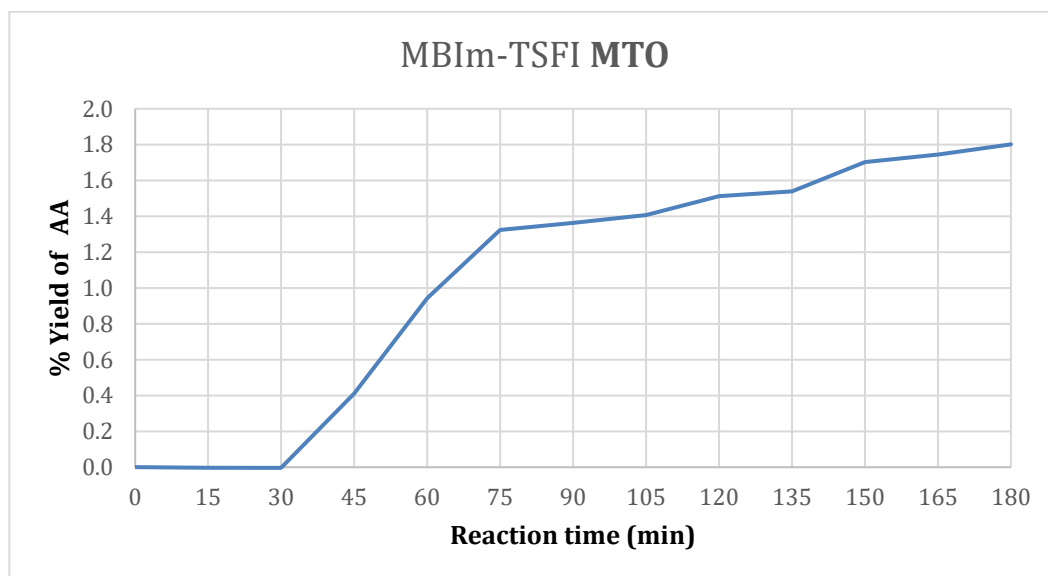

Figure S12  
Time course of DODH reaction of Gly in MBlm-TFSI, catalysed by MTO at very early time (180 min).

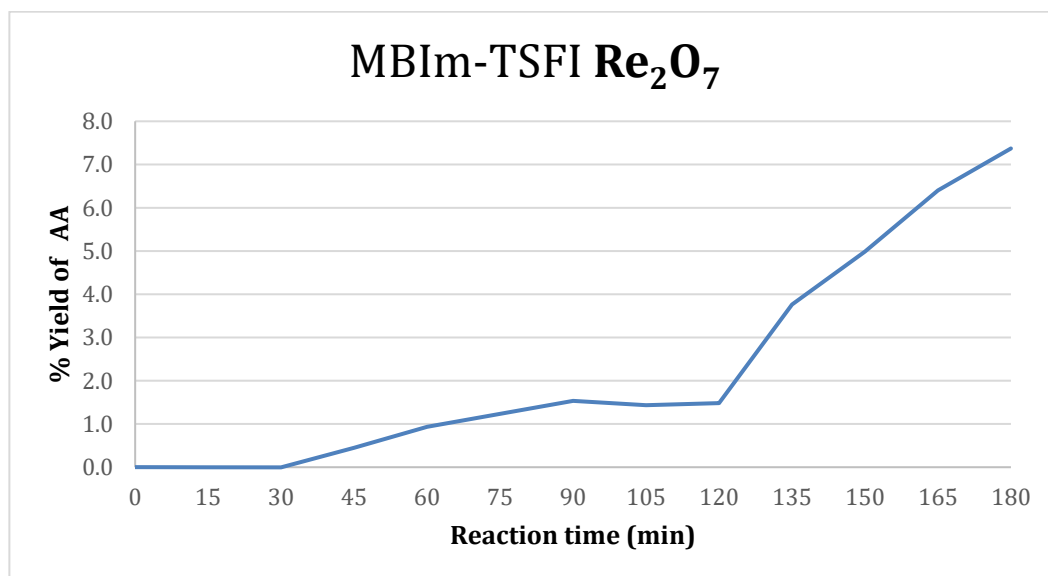

Figure S13  
Time course of DODH reaction of Gly in MBIm-TFSI, catalysed by  $\text{Re}_2\text{O}_7$  at very early time (180 min).

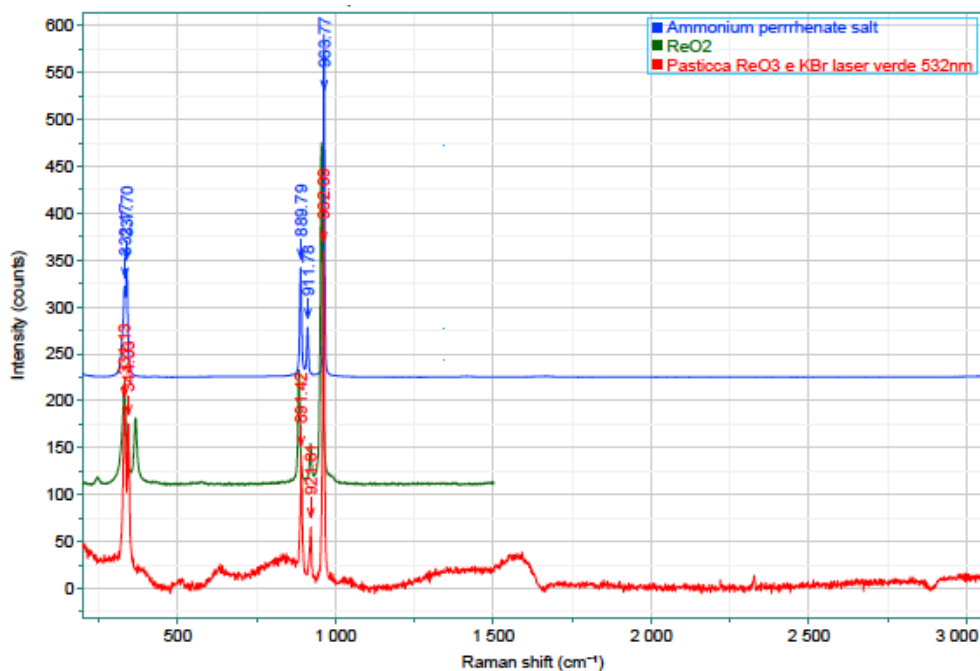

Figure S14

Raman spectra of  $\text{NH}_4\text{ReO}_4$  (blue line),  $\text{ReO}_2$  (green line) and  $\text{ReO}_3$  (red line). While  $\text{NH}_4\text{ReO}_4$  and  $\text{ReO}_2$  spectra were recorded simply using directly the purchased material without other procedure, for  $\text{ReO}_3$ , at 532 nm (used laser wavelength), it was necessary to make KBr tablet containing the oxide dispersed inside: the strong absorption at such wavelength, induces a strong heating that does not allow to record a satisfying spectrum. Also spectra recorded with the other laser wavelength present in our Raman instrument (638 nm), does not allow to record easily interpretable Raman spectra



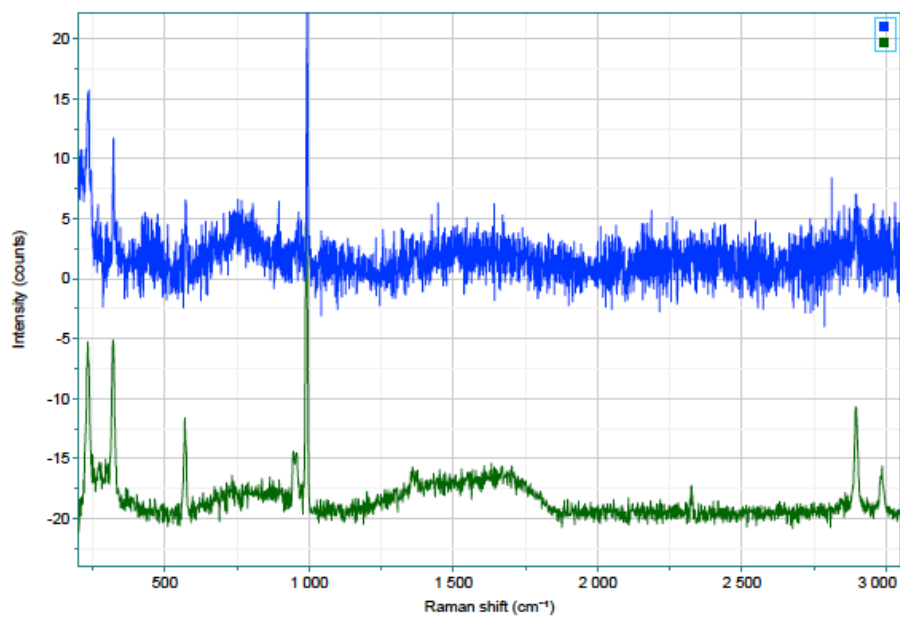

Figure S15

Raman spectra of an MTO tablet, recorded by use the two different laser wavelengths available on the Raman instrument at our disposal: the green layout is relative to the 532 nm laser beam while the blue layout is relative to the 638 nm laser beam
